# Supplementary material for: Effects of Adjuvant Sorafenib and Sunitinib on Cardiac Function in Renal Cell Carcinoma Patients without Overt Metastases: Results from ASSURE, ECOG 2805
Source: Oxford University Press journal article supplement (doi:10.1158/1078-0432.ccr-15-0215), 2015-05-12
Supplement: 10780432ccr150215-sup-144436_1_supp_2901213_nlbvt5.docx [file 10780432ccr150215-sup-144436_1_supp_2901213_nlbvt5.docx]

Randomized (n=1943)

Assessed at Baseline (n=1937)

Not Assessed at Baseline

(n=6)

Assessed by MUGA at Baseline (n=1880)

Assessed by Echo at Baseline (n=57)

At Least 1 Follow-up MUGA

(n=1603)

No Follow-up MUGA

(n=277)

Event in 6 Months or Followed by MUGA for 6 Months (n=1315)
